# Supplementary material for: Pan-Arctic seasonal cycles and long-term trends of aerosol properties from ten observatories
Source: Copernicus journal article supplement (doi:10.5194/acp-2021-756), 2021-09-08
Supplement: Supplementary file 1 [file acp-2021-756-supplement.pdf]

Supplementary Material

## **Pan-Arctic seasonal cycles and long-term trends of aerosol properties from ten observatories**

Julia Schmale<sup>1</sup>, Sangeeta Sharma<sup>2</sup>, Stefano Decesari<sup>3</sup>, Jakob Pernov<sup>4</sup>, Andreas Massling<sup>4</sup>, Hans-Christen Hansson<sup>5</sup>, Knut von Salzen<sup>2</sup>, Henrik Skov<sup>4</sup>, Elisabeth Andrews<sup>6</sup>, Patricia K. Quinn<sup>7</sup>, Lucia M. Upchurch<sup>7,8</sup>, Konstantinos Eleftheriadis<sup>9</sup>, Rita Traversi<sup>10,11</sup>

<sup>1</sup>Extreme Environments Research Laboratory, École Polytechnique fédérale de Lausanne, 1951 Sion, Switzerland

<sup>2</sup>Environment and Climate Change Canada, Science and Technology Branch, Climate Research Division, 4905 Dufferin Street, Toronto, Ontario M5T 3H4, Canada

<sup>3</sup>Institute of Atmospheric Sciences and Climate, National Research Council of Italy, 40129 Bologna, Italy

<sup>4</sup>Department of Environmental Science, iClimate, Aarhus University, Frederiksborgvej 399, 4000 Roskilde, Denmark

<sup>5</sup> Department of Environmental Science, Stockholm University, 106 91 Stockholm, Sweden

<sup>6</sup>Cooperative Institute for Research in Environmental Sciences (CIRES), University of Colorado, Boulder, Colorado 80309, USA

<sup>7</sup>Pacific Marine Environmental Laboratory, National Oceanic and Atmospheric Administration, Seattle, WA, USA

<sup>8</sup>Cooperative Institute for Climate, Ocean, and Ecosystem Studies, University of Washington, Seattle, WA, USA

<sup>9</sup> NCSR "Demokritos"-Institute of Nuclear and Radiological Sciences and Technology, Energy and Safety Environmental Radioactivity Laboratory, 15310 Athens, Greece

<sup>10</sup>Department of Chemistry "Ugo Schiff", University of Florence, 50019 Sesto F.no (Florence), Italy.

<sup>11</sup>Institute of Polar Sciences, ISP-CNR, University of Venice, 30172 Venice, Italy

Correspondence to: [julia.schmale@epfl.ch](mailto:julia.schmale@epfl.ch)
